# Supplementary material
Source: publisher site journal article supplement (https://www.dovepress.com/article/390602)

Supplementary Material


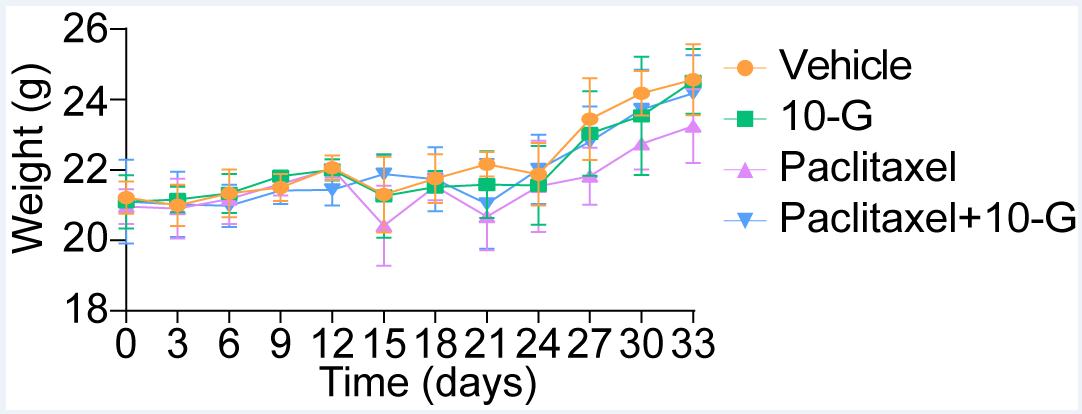


**Figure S1.** The body weight of mice.

Supplement: Supplementary file 1 [file get_supplementary_file.php]
